# Supplementary material
Source: PubMed Central journal article supplement (PMC6130356)
Supplement: pnas.1800526115.sapp.pdf [file pnas.1800526115.sapp.pdf]

## Supporting Information

Min et al.

**Table S1.** Description of antibodies used in this study.

| Primary antibodies | Manufacturer   | Catalog#    |                                 | Dilution (frozen sections) | Dilution (isolated cells) | Dilution (Flow cytometry) |
|--------------------|----------------|-------------|---------------------------------|----------------------------|---------------------------|---------------------------|
| Twist2             | Abcam          | Ab66031     | Rabbit polyclonal               | 1:200                      |                           | 1:50                      |
| Twist2             | Sigma          | WH0117581M1 | Mouse monoclonal                | 1:50                       |                           |                           |
| cTnI               | Abcam          | Ab47003     | Rabbit polyclonal               | 1:100                      |                           |                           |
| cTnT               | Invitrogen     | MA5-12960   | Mouse monoclonal                | 1:200                      | 1:200                     |                           |
| $\alpha$ -actinin  | Abcam          | Ab90776     | Rabbit polyclonal               | 1:200                      |                           |                           |
| CD31               | BD Biosciences | 553370      | Mouse monoclonal                | 1:100                      | 1:200                     |                           |
| vimentin           | Sigma          | V2258       | Mouse monoclonal                | 1:100                      |                           |                           |
| $\alpha$ -SMA      | Sigma          | A2547       | Mouse monoclonal                | 1:200                      |                           |                           |
| DDR2               | Sigma          | SAB1302555  | Rabbit polyclonal               |                            | 1:200                     |                           |
| CD105              | BioLegend      | 120413      | CD105-APC Rat IgG2A             |                            |                           | 1:50                      |
| CD73               | BD Biosciences | 561545      | CD73-Alexa Fluor 488 Rat IgG2A  |                            |                           | 1:50                      |
| CD44               | BD Biosciences | 561862      | CD44-APC Rat IgG2B              |                            |                           | 1:50                      |
| c-kit              | BD Biosciences | 553356      | CD117-APC Rat IgG2B             |                            |                           | 1:50                      |
| pdgfra             | R&D Systems    | FAB1062G    | pdgfra-Alexa Fluor 488 Goat IgG |                            |                           | 1:50                      |
| CD31               | BD Biosciences | 551262      | CD31-APC Rat IgG2A              |                            |                           | 1:50                      |
| CD90.2             | BD Biosciences | 561974      | CD90.2-APC Rat IgG2A            |                            |                           | 1:50                      |
| CD45               | R&D Systems    | 967208      | CD45-PerCP Rat IgG2B            |                            |                           | 1:20                      |
| CD29               | eBioscience    | 17-0291-82  | CD29-APC Hamster IgG            |                            |                           | 1:20                      |
| Sca-1              | BD Bioscience  | 560654      | Ly-6A/E-APC-Cy7 Rat IgG2A       |                            |                           | 1:20                      |
| CD105              | R&D Systems    | 967207      | CD105/Endoglin-CFS Rat IgG2A    |                            |                           | 1:20                      |

| Isotype Controls          | Manufacturer   | Catalog# |                                            | Dilution (Flow cytometry) |
|---------------------------|----------------|----------|--------------------------------------------|---------------------------|
| PerCP Rat IgG2B           | R&D Systems    | 967114   | Rat IgG2B-PerCP Isotype Control            | 1:20                      |
| APC Hamster IgG           | eBioscience    | 17-4888  | Armenian Hamster IgG-APC Isotype Control   | 1:20                      |
| APC-Cy7 Rat IgG2A         | BD Bioscience  | 552770   | Rat IgG2a-APC-Cy7 Isotype Control          | 1:20                      |
| CFS Rat IgG2A             | R&D Systems    | 965715   | Rat IgG2A-CFS Isotype Control              | 1:20                      |
| APC Rat IgG2B             | BD Biosciences | 553991   | Rat IgG2b-APC Isotype Control              | 1:50                      |
| APC Rat IgG2A             | BD Biosciences | 553932   | Rat IgG2a-APC Isotype Control              | 1:50                      |
| Alexa Fluor 488 Goat IgG  | R&D Systems    | IC108G   | Goat IgG-Alexa Fluor 488 Isotype Control   | 1:50                      |
| Alexa Fluor 488 Rat IgG2a | BD Biosciences | 557676   | Rat IgG2a-Alexa Fluor® 488 Isotype Control | 1:50                      |

| Secondary antibodies | Manufacturer      | Catalog# |                            | Dilution (frozen sections) | Dilution (isolated cells) | Dilution (Flow cytometry) |
|----------------------|-------------------|----------|----------------------------|----------------------------|---------------------------|---------------------------|
| Alexa Fluor 488      | Life Technologies | A-11029  | Goat anti Mouse IgG (H+L)  | 1:400                      | 1:400                     |                           |
| Alexa Fluor 488      | Life Technologies | A-11008  | Goat anti-Rabbit IgG (H+L) | 1:400                      | 1:400                     |                           |
| Alexa Fluor 647      | Life Technologies | A-21236  | Goat anti-Mouse IgG (H+L)  |                            |                           | 1:200                     |
| Alexa Fluor 647      | Life Technologies | A-32733  | Goat anti-Rabbit IgG (H+L) |                            |                           | 1:200                     |

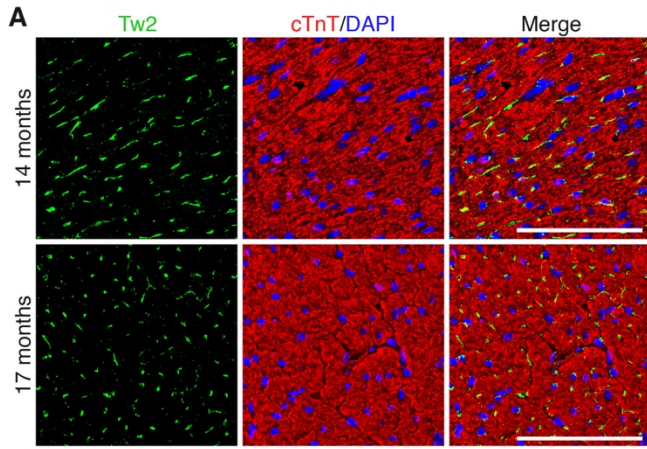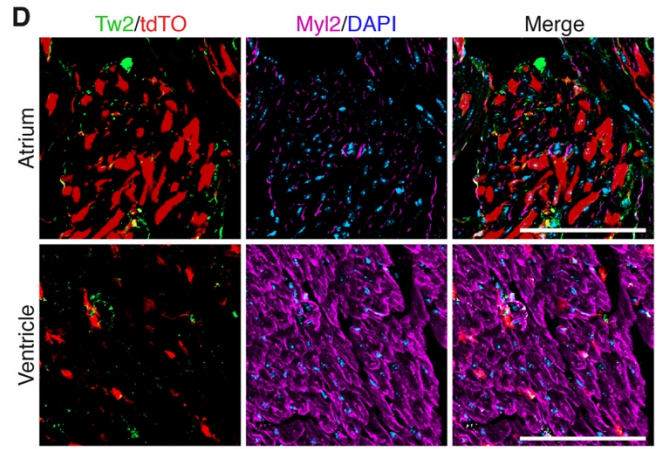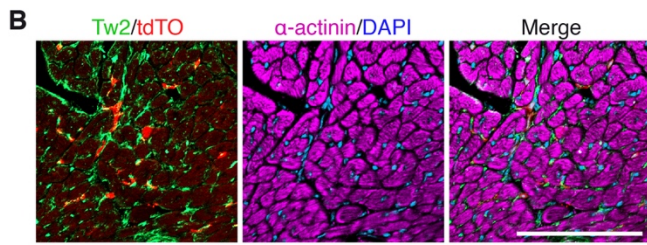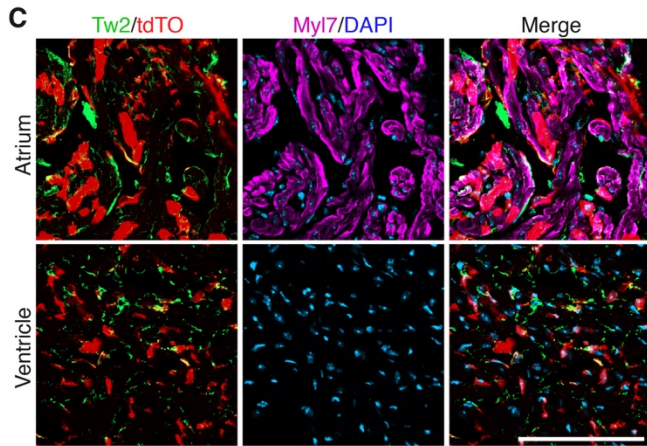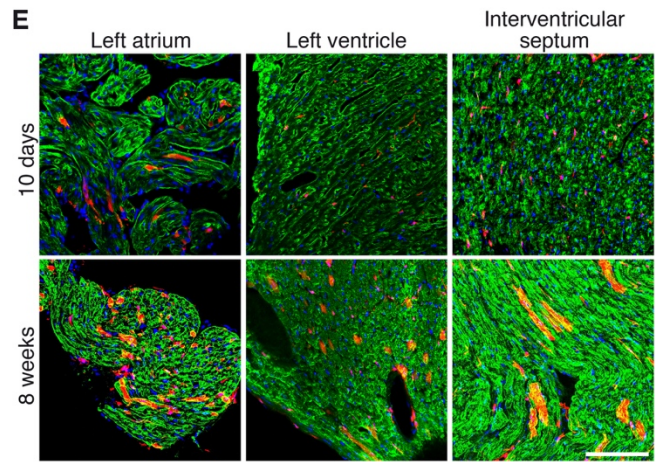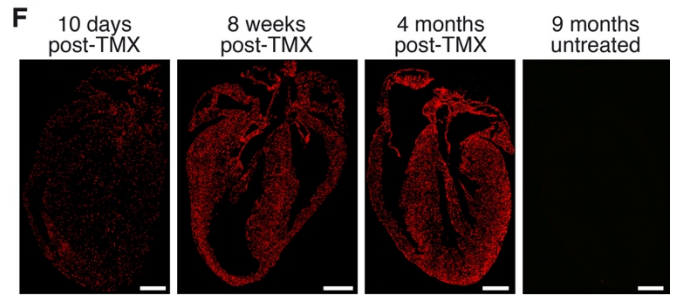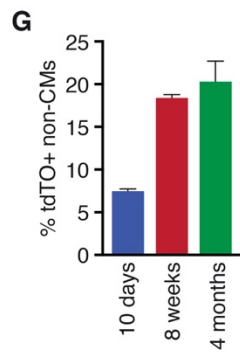

**Fig. S1.** Analysis of Tw2-tdTO<sup>+</sup> cells in adult heart.

- (A) Immunostaining of Tw2 (green) and cTnT (red) proteins on heart sections of 14- and 17-month old wild-type mice. Scale bar: 100  $\mu$ m.
- (B) Tw2 antibody immunostaining (green) and tdTO labeling on heart sections of Tw2-CreERT2; R26-tdTO mice at 10 days post TMX treatment. Scale bar: 100  $\mu$ m.
- (C) Tw2 antibody immunostaining (green) and tdTO labeling in atrium and ventricle at 10 days post-TMX treatment. Sections were co-immunostained with anti-Myl7, an atrial marker (violet). Scale bar: 100  $\mu$ m.
- (D) Tw2 antibody immunostaining (green) and tdTO labeling in atrium and ventricle at 10 days post-TMX treatment. Sections were co-immunostained with anti-Myl2, a ventricular marker (violet). Scale bar: 100  $\mu$ m.
- (E) tdTO labeling in left atrium, left ventricle and interventricular septum at 10 days and 8 weeks post-TMX treatment. Sections were immunostained with cTnT. Scale bar: 100  $\mu$ m.
- (F) Whole heart imaging at various time points post-TMX treatment. Right panel shows absence of tdTO signal in heart of Tw2-CreERT2; R26-tdTO mice without TMX treatment. Scale bar: 100  $\mu$ m.
- (G) Percentage of tdTO<sup>+</sup> non-CMs was quantified and averaged at indicated time points. n= 3 mice for each time point. Data are expressed as mean  $\pm$  SEM.

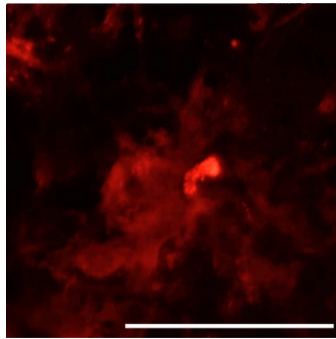

**Fig. S2.** Image from video (see MovieS1) of Tw2-tdTO<sup>+</sup> cells that differentiated into beating CMs in culture. Scale bar: 100  $\mu$ m.

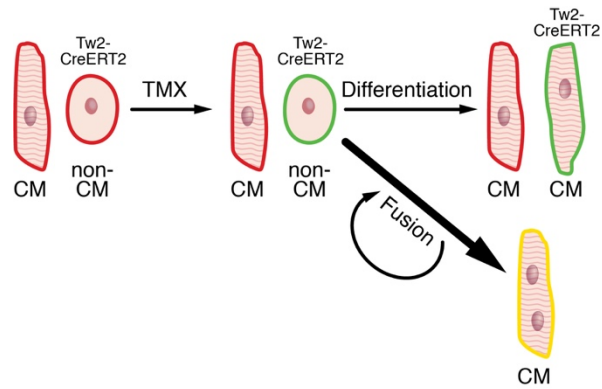

**Fig. S3.** Schematic of using Tw2-CreERT2; R26-mT/mG/+ mice to distinguish between fusion and differentiation events. CM denotes cardiomyocytes, non-CM represents non-cardiomyocytes. Upon TMX treatment of Tw2-CreERT2; R26-mT/mG/+ mice, a CM with a yellow membrane represents fusion of a non-CM to a CM. On the other hand, a CM with a green membrane represents de novo differentiation of a non-CM to a CM.

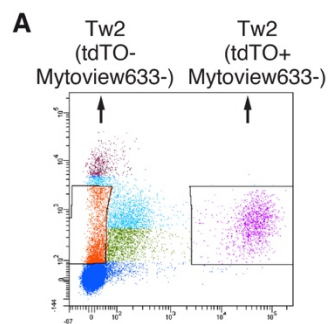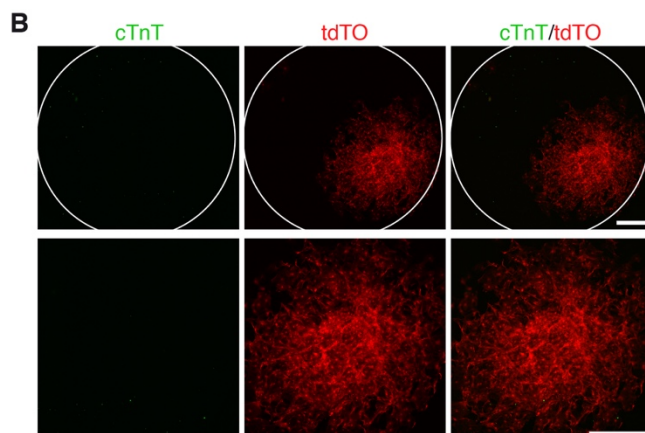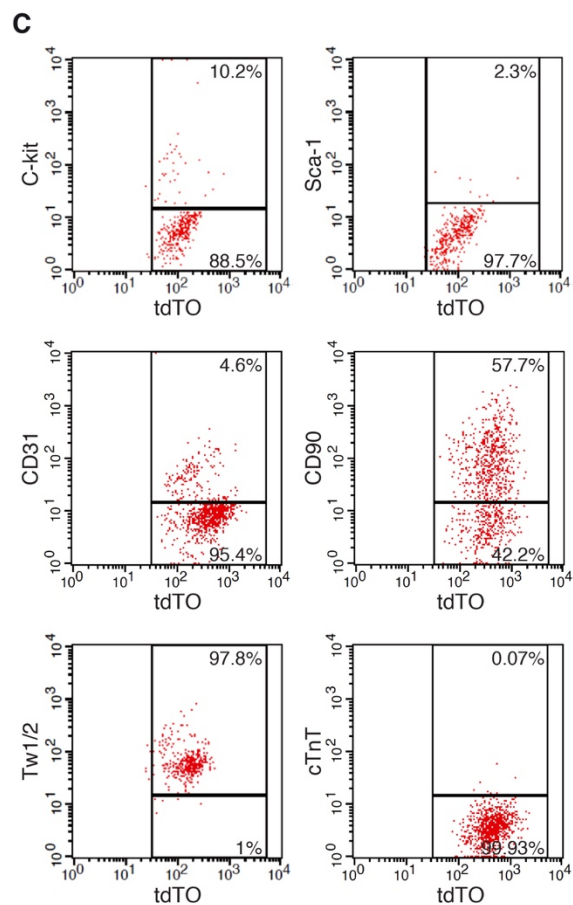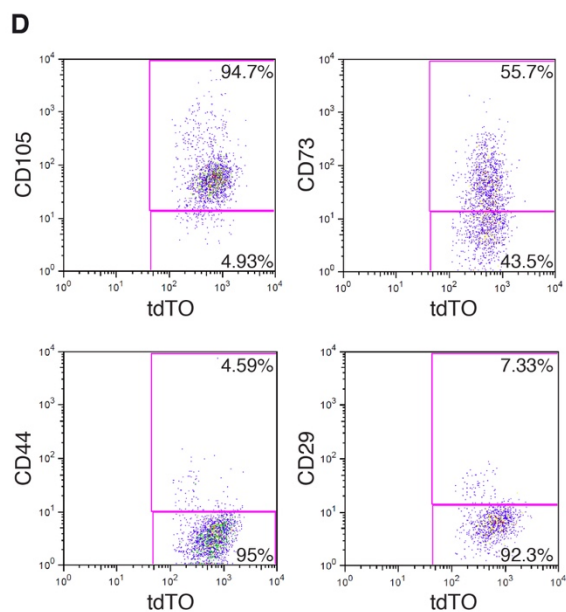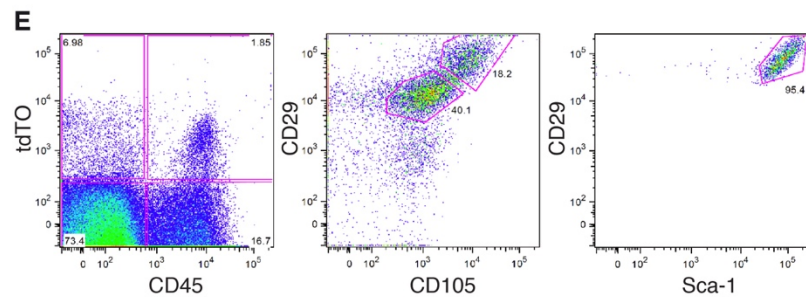

**Fig. S4.** FACS analysis of Tw2-tdTO<sup>+</sup> cells.

(A) FACS plot showing isolation of Tw2-tdTO<sup>+</sup> (tdTO<sup>+</sup>; Mitoview 633 low) and Tw2-tdTO<sup>-</sup> (tdTO<sup>-</sup>; Mitoview 633 low) cell populations from ventricles of Tw2-CreERT2; R26-tdTO mice at 10 days post-TMX treatment.

(B) Representative images of a well containing cTnT negative cells from clonal analysis. The images were acquired using an INCell high throughput confocal microscope under 4X lens. Bottom panels show magnified images. Scale bar: 100  $\mu$ m.

(C) FACS analysis for expression of Twist, cTnT, CD31, and CD90 was performed on Tw2-tdTO<sup>+</sup> cells isolated from ventricles of Tw2-CreERT2; R26-tdTO mice at 10 days post-TMX treatment.

(D) FACS analysis for expression of CD105, CD73, CD44, and CD29 was performed on Tw2-tdTO<sup>+</sup> cells isolated from ventricles of Tw2-CreERT2; R26-tdTO mice at 10 days post-TMX treatment.

(E) FACS plot showing multi-color MSC panel analysis of Tw2-tdTO<sup>+</sup> cells isolated from ventricles of Tw2-CreERT2; R26-tdTO mice at 10 days post-TMX treatment. CD45<sup>-</sup>, CD29<sup>+</sup>, CD105<sup>+</sup>, and Sca-1<sup>+</sup> mark MSC population.



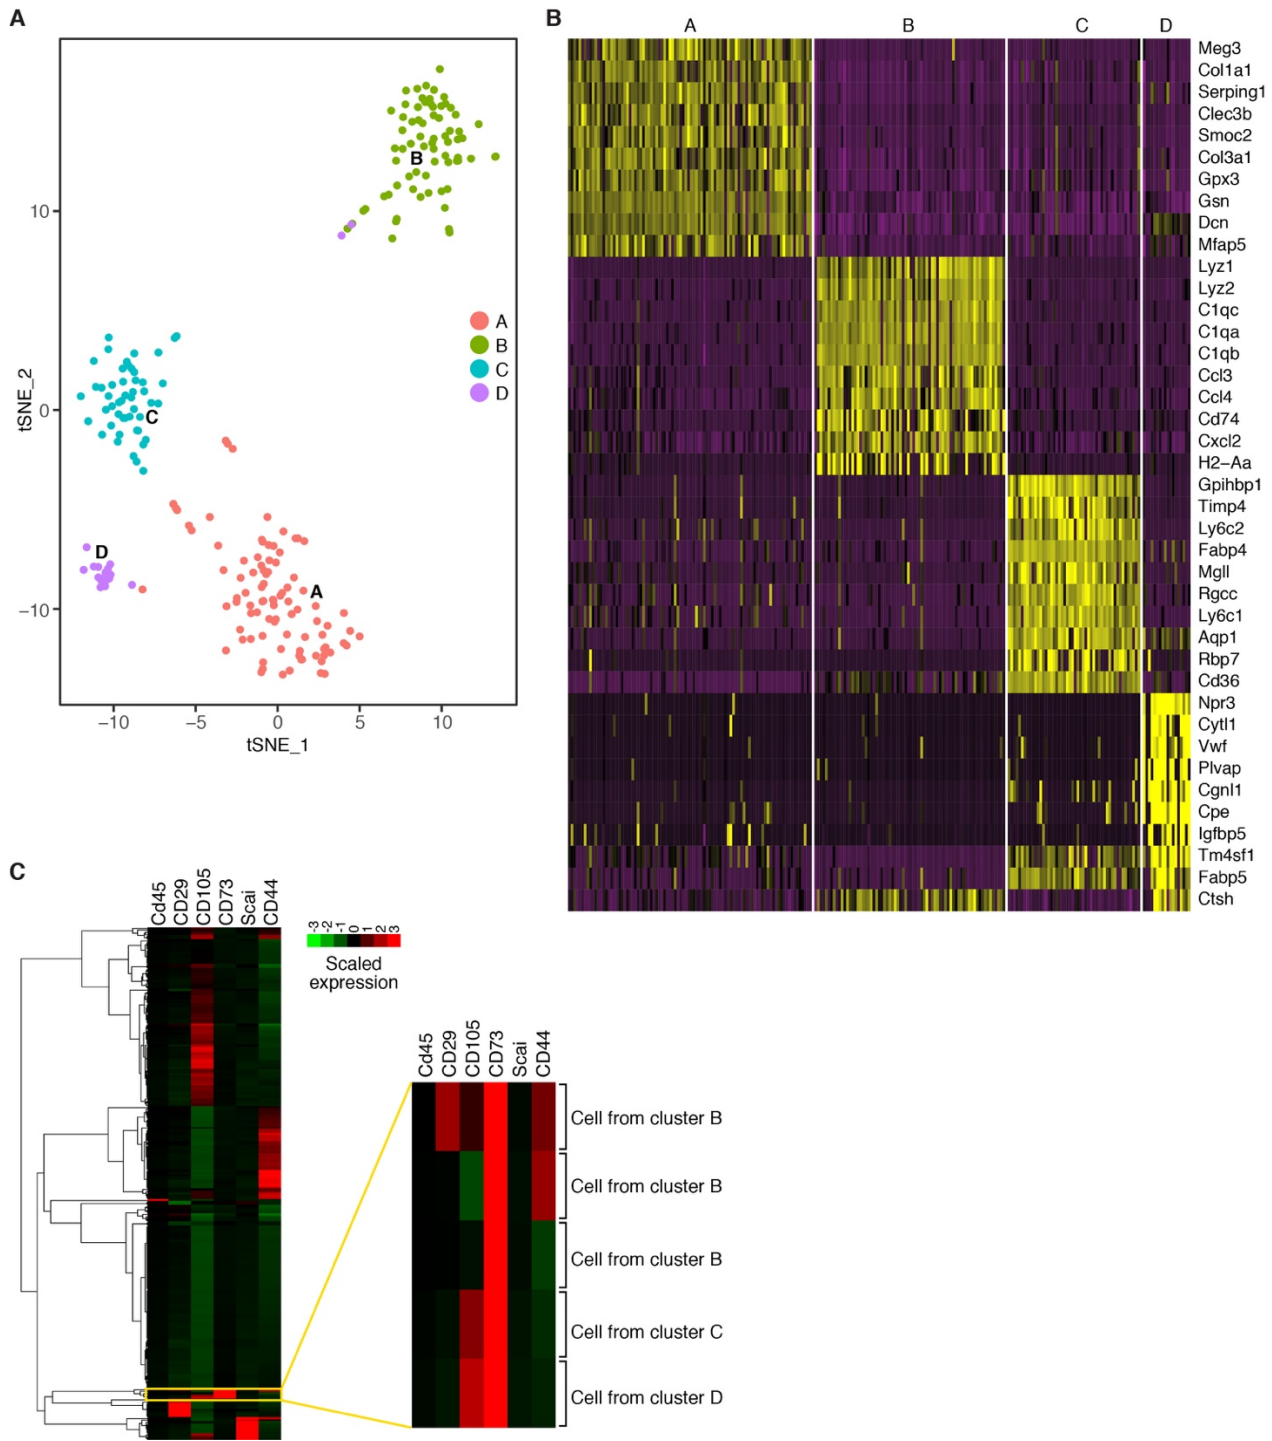

**Fig. S5.** Single cell RNA-seq of Tw2-tdTO+ cells.

(A) tSNE plot of the Tw2-tdTO+ cells. Each cluster is alphabetically labeled and color coded.

(B) Heat map of the 5 clusters with top 10 enriched marker genes, as identified by single cell RNA-seq.

(C) Heat map showing the expression of 6 MSC marker genes in each of the single Tw2-tdTO+ cells.

**A**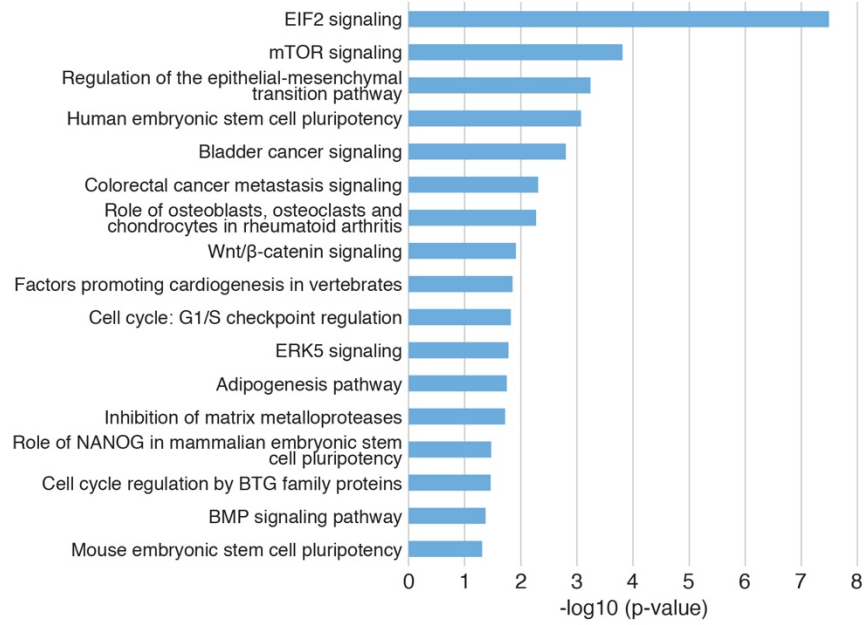**B**

Gene ontology analysis for up-regulated genes in Tw2-tdTO+ cells in heart

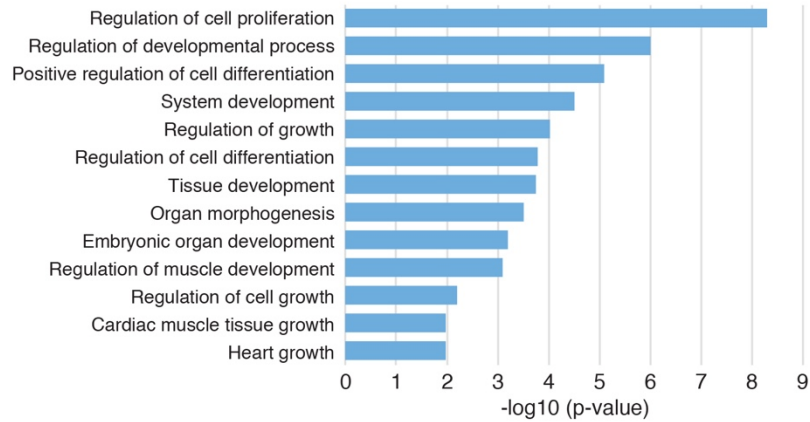**C**

Ingenuity pathway analysis for overlapping genes in Tw2-tdTO+ cells in heart and SKM

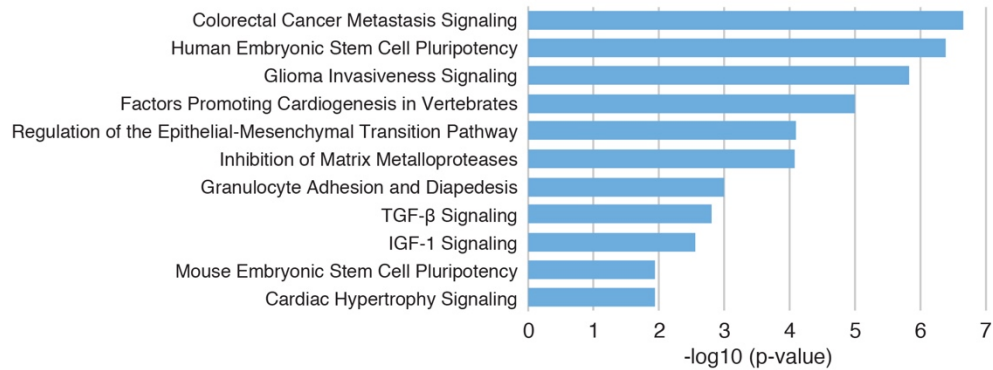**D**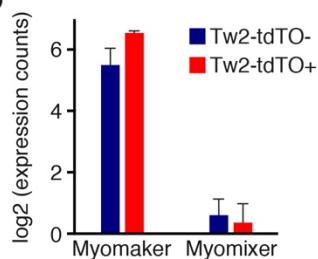

**Fig. S6.** RNA-seq analysis of Tw2-tdTO<sup>+</sup> cells. (A) IPA analysis of genes enriched in Tw2-tdTO<sup>+</sup> cells relative to Tw2-tdTO<sup>-</sup> cells. (B) GO analysis of up-regulated genes in Tw2-tdTO<sup>+</sup> cells compared to Tw2-tdTO<sup>-</sup> interstitial cells. (C) IPA analysis of the 380 overlapping genes in Tw2-tdTO<sup>+</sup> cells in heart and skeletal muscle (SKM). (D) Myomaker and myomixer expression profile in Tw2-tdTO<sup>+</sup> and Tw2-tdTO<sup>-</sup> cells.

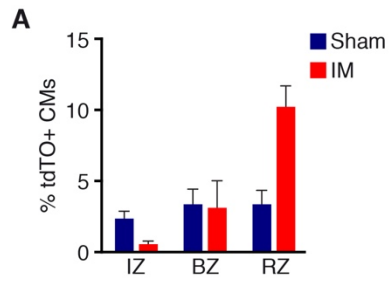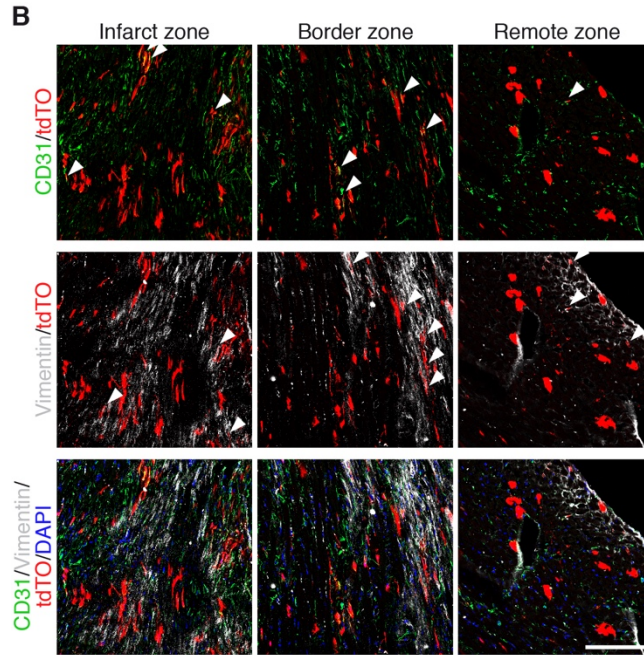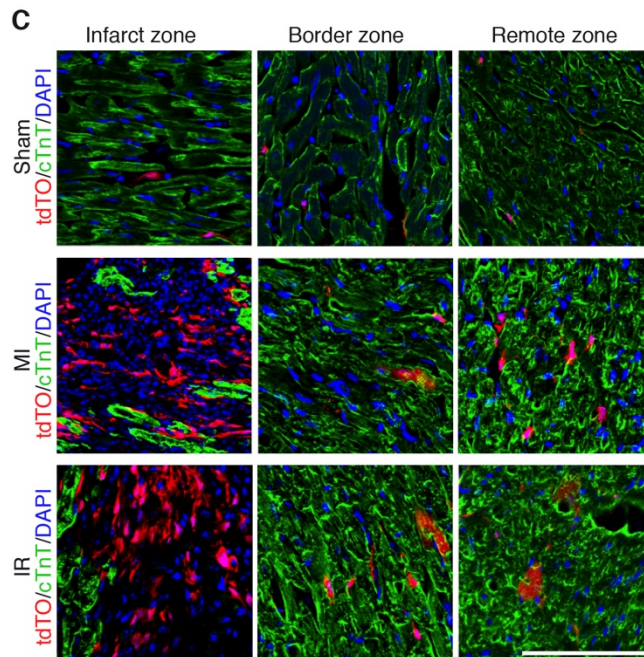

**Fig. S7.** Tw2-tdTO+ cells during myocardial injury after MI and I/R.

(A) Quantification of the Tw2-tdTO+ CMs in infarct zone (IZ), boarder zone (BZ) and remote zone (RZ) after sham and MI injury.

(B) Different areas of the heart after 1 week of IR were co-immnuostained with vimentin (grey) and CD31 (green). Infarct zone in the left panels, border zone in the middle panels, and remote zone in the right panels after 1 week of IR. Scale bar: 100 um.

(C) Immunostaining of different areas of the heart after MI. Infarct zone in the left panels, border zone in the middle panels, and remote zone in the right panels after 2 weeks of MI and I/R. cTnT marks cardiomyocytes in green. Scale bar: 100 um.

## **Supporting Information – Movie**

**Movie S1.** Tw2-tdTO+ cells differentiated into CMs when maintained in CM induction media, as identified by expression of the CM marker cTnT (red). Movie shows that some of the differentiated CMs began beating after 2 weeks of culture.
